# Supplementary material
Source: PubMed Central journal article supplement (PMC2673993)
Supplement: NIHMS83800-supplement-SOM.pdf [file NIHMS83800-supplement-SOM.pdf]

## **Materials and Methods**

### *Study Populations*

#### Heredity and Phenotype Intervention (HAPI) Heart Study

The Heredity and Phenotype Intervention (HAPI) Heart Study began in 2003 to identify genes that interact with environmental exposures to influence risk for cardiovascular disease (S1). The study protocol was approved by the Institutional Review Board at the University of Maryland and all subjects gave written informed consent. The genome-wide association study (GWAS) was carried out in 809 Old Order Amish participants (of a total of 868) who completed the high fat feeding intervention and were successfully genotyped using the Affymetrix GeneChip® Human Mapping 500K Array Set. All 809 subjects could be connected to a single 14-generation pedigree, which was constructed using published Amish genealogy sources (S2, S3) and by querying the Anabaptist Genealogy Database (AGDB) 4.0 (S4) for all common ancestors of and connections among study subjects using the PedHunter software package (S5).

HAPI participants underwent a medical history interview including assessment of CVD risk factors, prescription and nonprescription medication usage and questions about prior history of CVD. Physical examinations were conducted at the Amish Research Clinic in Strasburg, PA and blood samples were obtained following an overnight fast. Those taking lipid-lowering medications at enrollment (1.3%) discontinued usage 7 days prior to examination.

#### Amish Family Calcification Study

The Amish Family Calcification Study (AFCS) was initiated in 2001 to identify the determinants of vascular calcification and to evaluate the relationship between calcification of bone and vascular tissue (S6). Old Order Amish subjects underwent a detailed medical examination including the measurement of coronary artery calcification (CAC) by electron beam computed tomography (EBCT) and a standard lipid panel as described below. Of 1,033 AFCS participants successfully genotyped for the APOC3 R19X mutation, 335 were also participants in the HAPI Heart high fat feeding intervention and GWAS, and 698 individuals were non-overlapping.

#### *High Fat Feeding Intervention*

The high fat challenge, administered to the HAPI Heart subjects, was prepared in the form of a whipping cream milk shake and was standardized to consist of 782 calories per m<sup>2</sup> of body surface with 77.6% of calories from fat, 19.2% from carbohydrate, and 3.1% from protein, and was administered after an overnight fast. Blood was drawn just prior to (time = 0 hours) and 1, 2, 3, 4, and 6 hours after ingestion of the fat load to assess the triglyceride excursion. The subject rested and remained otherwise fasting during the 6 hours post-fat challenge.

#### *Phenotype Measurement*

Height and weight were measured using a stadiometer and calibrated scale with shoes removed and in light clothing, and body mass index (BMI) (kg/m<sup>2</sup>) was computed. Systolic blood pressure (SBP) (1st phase) and diastolic blood pressure (DBP) (5th phase) were obtained in triplicate using a standard sphygmomanometer with the subject sitting for at least 5 minutes. Fasting (FTG) and post-challenge triglyceride and fasting total cholesterol, HDL-C and glucose levels were measured by Quest Diagnostics (Lancaster, PA). All subjects except three AFCS participants had FTG < 400 mg/dl and LDL-C levels were calculated by the Friedewald equation (S7). Framingham 10 year coronary heart disease (CHD) risk was calculated for each AFCS participant by entering measured lipid levels/ blood pressure and self-reported diabetes/ smoking status into LDL-based risk equations (S8).

Triglyceride total area under the curve (tAUCTG) was calculated in fat challenge participants by the trapezoid method, and incremental area under the curve (iAUCTG) was calculated as tAUCTG – 6 x FTG. Incremental maximum TG (iMAXTG) was calculated as the highest of the six TG levels obtained (MAXTG) – FTG. Lipoprotein subfractions, including those of very low density lipoprotein (VLDL) and intermediate density lipoprotein (VLDL) cholesterol, were measured at zero and four hours by Vertical Auto Profile (VAP) technology (Atherotech, Birmingham, AL). Insulin was measured by radioimmunoassay (coefficient of variation = 4.42%).

Circulating apoC-III serum protein levels were assayed in 20 HAPI Heart participants from four two-generation families and one sib pair using a western blot. Plasma was diluted 1:4 with phosphate-buffered saline (PBS). One microliter of the diluted serum was subjected to 10-20% SDS-PAGE, transferred to immobilon-P (Millipore) membranes, probed with anti-apoC-III polyclonal antibodies (Santa Cruz Biotechnologies), detected with goat anti-mouse HRP (horseradish peroxidase) conjugate, visualized with Femto-West chemiluminescence reagent (Pierce) and quantitated with a Fluorchem 8000 chemiluminescence /fluorescence imager (Alpha Innotech). Each serum sample was run in duplicate and normalized to a standardized pooled serum sample derived from a group of anonymous donors. The intra-subject coefficient of variation was 11.1%.

Coronary artery calcification (CAC) was measured in AFCS participants by electron beam computed tomography in a total of 1,033 Amish individuals, including 335 from the HAPI Heart Study as well as an additional 698 participating in the AFCS (S6, S9). Measurement was performed with an Imatron C-150 scanner (Imatron, Inc.: San Francisco, CA). Scan protocol included 30 to 40 three mm contiguous transverse slices between the aortic root and the apex of the heart, gated to 80% of the R-R interval obtained during a single breath hold. CAC was quantified using the Agatston method which incorporates both density and area (S10). The sum of the Agatston scores in the left main, left anterior descending, circumflex, and right coronary arteries was considered the CAC score. CAC presence was defined as a density >130 Hounsfield units in greater than three contiguous pixels (> 1 mm<sup>2</sup>). All scans were scored by an experienced cardiologist and reviewed for extra-cardiac findings by an experienced radiologist. Interscan reproducibility for CAC quantity with the scoring software was previously reported to range from 89% (S11) to 94% (S12). The interreader and intrareader reproducibilities were each ~99%.

### *Genotyping and sequencing*

#### Genome-wide association analysis

GWAS of the 809 HAPI Heart Study samples was carried out using the Affymetrix GeneChip® Human Mapping 500K Array set. The 500K array set consists of two microarray chips (*NspI* and *StyI*), which collectively include a total of 500,568 single nucleotide polymorphisms (SNPs). Total genomic DNA (250 ng) was digested with *NspI* or *StyI* and processed according to the Affymetrix protocol. Genotype calls were made using the BRLMM genotype calling algorithm (<http://www.affymetrix.com>). A confidence threshold, a measure of the call quality, of 0.5 was used for this analysis. The resulting mean genotype call rate across the 809 samples was 98.1%. SNPs with minor allele frequencies (MAF) < 1% in the overall sample were removed from further analyses. Finally, 381,934 informative autosomal SNPs that passed quality-control (call rate ≥ 90%) and Hardy-Weinberg Equilibrium checks ( $p > 10^{-5}$ ) were included in the analysis.

### *APOC3* gene sequencing and genotyping

Exons 1-3 and the coding region of exon 4 of the *APOC3* gene were amplified in three PCR reactions (primer sequences available upon request) and sequenced in eight rs10892151-A carriers and eight of their non-carrier relatives using an ABI 3730xl sequencer. Sequences were compared to the reference sequence and mutations identified using the Sequencher software package. Upon discovery of the 55C>T (R19X) nonsense mutation in seven of the eight rs10892151-A carriers, a Taqman® assay was designed to genotype all HAPI Heart Study and AFCS participants as well as 996 additional Amish adults participating in studies of complex diseases at the University of Maryland and 214 unrelated Caucasian adults from the Baltimore community serving as healthy controls for several studies at the University of Maryland. Blind replicate concordance rates were 100% and no Mendelian inconsistencies were found.

### *Statistical Analysis*

Association analyses of quantitative traits were performed using the measured genotype approach that models variation in the trait of interest as a function of measured environmental covariates, measured genotype, and a polygenic component to account for phenotypic correlation due to relatedness. A t-test was used to assess significance of the measured genotype beta coefficient under an additive model. We included sex and sex-specific age and age<sup>2</sup> and in some models body mass index (BMI) as covariates and coded the SNPs using an additive model. The polygenic component was modeled using the relationship matrix derived from the complete 14-generation pedigree structure to properly control for the relatedness of all subjects in the study. These analyses were carried out using software developed in our group (*S13*). Quantile-quantile plots comparing the observed GWA p-values with those expected under the null are provided in Figure S1. Quantitative traits which were not normally distributed were transformed by their natural logarithm. For CAC, a constant of one was added prior to transformation since some participants had a raw trait level of zero. Results were plotted using Haploview Version 4.0 (*S14*) and are shown in Figure S1.

Odds ratios were estimated and significance of association of the variant with optimal plasma lipid categories, CAC presence and CAC score > 100 Agatston units was evaluated using generalized estimating equations (GEE) under a logistic model as implemented in SAS Version 9.1 with age and sex included as fixed covariates and sibship membership included as a random effect with an exchangeable correlation matrix. Association with CAC score  $\geq 75^{\text{th}}$  age- and sex-specific percentile as determined in asymptomatic participants in the Multi-Ethnic Study of Atherosclerosis (MESA) (*S15*) was analyzed with GEE adjusted for sibship only.

Linkage disequilibrium was evaluated using Haploview Version 4 (*S14*).

### **SOM Text: Origin of the *APOC3* R19X Mutation**

A total of 2,503 Amish adults (approximately 15-20% of the total adult Lancaster Amish population) were genotyped for *APOC3* R19X. Of these, 140 (5.6%) are carriers of the R19X mutation. To identify the origin of the mutation, we searched a 14-generation pedigree constructed from the Anabaptist Genealogy Database (AGDB) (*S5*, *S16*) for common ancestors of these 140 individuals using the ANCESTOR routine in the PEDSYS software package (*S17*). A couple born near the beginning of the 19<sup>th</sup> century (1800) emerged as the most likely origin of all present-day copies of the mutation (Figure S3); all 140 individuals with the RX genotype were descended from this couple, whereas only 1,312 of 2,363 (56%) of individuals with the RR genotype were descended from this couple. The pedigree is compatible with either a *de novo* mutation or a founder effect, as the couple was two to five generations removed from original

Amish founders. Extended haplotype analysis (Figure S4) was most consistent with a founder effect, with a single copy of the mutated allele entering the population through a single founder prior to 1800. Only one extended haplotype contained the *APOC3* R19X mutation (Figure S4). The mutation was not present in 214 non-Amish Caucasian subjects (428 alleles).

Table S1: Characteristics of 809 HAPI Heart study subjects completing the high fat challenge (Mean  $\pm$  SD or Median [IQR]) and GWAS. Serum traits are fasting values.

| Trait                              | Men             | Women            |
|------------------------------------|-----------------|------------------|
| N                                  | 443             | 366              |
| Age (y)                            | 42 $\pm$ 14     | 45 $\pm$ 14      |
| BMI (kg/m <sup>2</sup> )           | 25.6 $\pm$ 3.2  | 27.7 $\pm$ 5.3   |
| Waist (cm)                         | 90.0 $\pm$ 10.0 | 84.0 $\pm$ 11.0  |
| Total Cholesterol (mg/dl)          | 203 $\pm$ 44    | 214 $\pm$ 48     |
| HDL-C (mg/dl)                      | 53 $\pm$ 13     | 59 $\pm$ 15      |
| LDL-C (mg/dl)                      | 137 $\pm$ 40    | 140 $\pm$ 45     |
| Triglycerides (mg/dl) Median (IQR) | 53 (41 – 75)    | 59 (42 – 89)     |
| Glucose (mg/dl)                    | 86 $\pm$ 8      | 86 $\pm$ 9       |
| Insulin ( $\mu$ U/ml) Median (IQR) | 7.8 (6.3 – 9.7) | 8.5 (6.9 – 10.9) |
| SBP (mm Hg)                        | 122 $\pm$ 12    | 121 $\pm$ 16     |
| DBP (mm Hg)                        | 78 $\pm$ 9      | 76 $\pm$ 8       |

Table S2: GWAS SNPs with p-values for ln-FTG or ln-iAUCTG  $\leq 0.0001$ . SNPs with significant association after Bonferroni correction ( $p < 10^{-7}$ ) indicated in bold. SNP closest to *APOC3* indicated by an asterisk. Relative location of *APOC5/A4/C3/A1* cluster indicated by a text box.

| SNP        | Chr | Position    | Alleles (A/B) | Allele Freq (B) | Strand | ln-FTG p-value | ln-iAUCTG p-value | Nearby Gene(s)         |
|------------|-----|-------------|---------------|-----------------|--------|----------------|-------------------|------------------------|
| rs630075   | 1   | 9,293,498   | C/T           | 0.34            | -      | 7.0E-05        | 0.06              | <i>SPSB1</i>           |
| rs4908842  | 1   | 9,309,898   | A/G           | 0.55            | -      | 5.9E-05        | 0.03              | <i>SPSB1</i>           |
| rs912962   | 1   | 10,271,299  | G/T           | 0.44            | -      | 9.6E-05        | 0.95              | <i>KIF1B</i>           |
| rs2745276  | 1   | 11,563,870  | A/G           | 0.89            | +      | 2.4E-05        | 0.02              | <i>FBXO2/ FBXO44</i>   |
| rs2817644  | 1   | 11,570,256  | A/G           | 0.87            | -      | 7.8E-06        | 0.22              | <i>FBXO2/ FBXO44</i>   |
| rs10492995 | 1   | 18,579,960  | G/T           | 0.97            | -      | 0.005          | 9.1E-05           | <i>IGSF21/ KLHDC7A</i> |
| rs34783763 | 1   | 43,530,349  | A/G           | 0.26            | -      | 0.01           | 4.5E-05           | <i>C1orf210/ TIE1</i>  |
| rs787503   | 1   | 67,846,229  | A/G           | 0.92            | +      | 3.0E-04        | 7.9E-05           |                        |
| rs1749517  | 1   | 69,837,458  | C/G           | 0.86            | +      | 6.0E-05        | 0.03              |                        |
| rs4656414  | 1   | 162,511,653 | C/T           | 0.59            | -      | 0.007          | 8.2E-05           |                        |
| rs13395978 | 2   | 121,104,379 | A/G           | 0.08            | -      | 8.5E-05        | 0.04              |                        |
| rs12104997 | 2   | 207,547,751 | C/T           | 0.07            | -      | 0.001          | 6.5E-05           | <i>CPO/ KLF7</i>       |
| rs28294    | 3   | 45,231,195  | C/G           | 0.54            | -      | 0.56           | 6.6E-05           | <i>CDCP1/ TMEM158</i>  |
| rs13081218 | 3   | 105,942,556 | C/T           | 0.08            | +      | 1.3E-04        | 3.6E-05           |                        |
| rs2895287  | 3   | 105,946,243 | C/T           | 0.08            | -      | 1.3E-04        | 3.6E-05           |                        |
| rs7626000  | 3   | 105,956,811 | A/T           | 0.92            | +      | 2.7E-04        | 1.2E-05           |                        |
| rs6534543  | 4   | 127,465,125 | A/C           | 0.76            | -      | 1.3E-05        | 0.003             | <i>FAT4</i>            |
| rs17623445 | 4   | 166,114,108 | C/T           | 0.07            | -      | 5.4E-05        | 0.003             |                        |
| rs10070815 | 5   | 14,010,465  | C/G           | 0.15            | +      | 8.9E-05        | 0.003             | <i>DNAH5/ TRIO</i>     |
| rs268731   | 5   | 33,400,441  | C/T           | 0.96            | +      | 5.8E-05        | 0.006             | <i>TARS</i>            |
| rs17207053 | 5   | 85,528,275  | C/T           | 0.03            | -      | 0.01           | 8.4E-05           |                        |
| rs6414953  | 5   | 88,999,906  | A/G           | 0.98            | +      | 7.6E-06        | 0.004             | <i>CETN3/ MEF2C</i>    |
| rs146689   | 5   | 96,782,445  | A/C           | 0.67            | -      | 0.04           | 6.5E-06           |                        |
| rs953952   | 5   | 96,791,184  | A/G           | 0.30            | +      | 0.02           | 4.6E-05           |                        |
| rs9314208  | 5   | 96,813,918  | A/G           | 0.65            | +      | 0.06           | 1.1E-05           |                        |
| rs11135514 | 5   | 96,816,018  | C/G           | 0.30            | -      | 0.02           | 4.3E-05           |                        |
| rs4869355  | 5   | 96,824,371  | C/G           | 0.70            | +      | 0.02           | 4.0E-05           |                        |
| rs1485469  | 5   | 96,843,284  | C/T           | 0.70            | -      | 0.01           | 4.5E-05           |                        |
| rs9384465  | 6   | 156,772,914 | A/C           | 0.90            | +      | 2.8E-05        | 0.04              |                        |

| SNP               | Chr       | Position           | Alleles (A/B) | Allele Freq (B) | Strand | ln-FTG p-value | ln-iAUCTG p-value | Nearby Gene(s)           |
|-------------------|-----------|--------------------|---------------|-----------------|--------|----------------|-------------------|--------------------------|
| rs10227912        | 7         | 38,018,111         | C/T           | 0.36            | +      | 5.7E-05        | 8.2E-05           | <i>EPDR1/ STARD3NL</i>   |
| rs7784959         | 7         | 38,027,068         | A/C           | 0.35            | +      | 3.7E-06        | 1.1E-06           | <i>EPDR1/ STARD3NL</i>   |
| rs10954663        | 7         | 81,584,556         | G/T           | 0.21            | -      | 7.7E-05        | 0.24              | <i>CACNA2D1</i>          |
| rs10486942        | 7         | 81,596,318         | A/G           | 0.21            | +      | 9.5E-05        | 0.22              | <i>CACNA2D1</i>          |
| rs7786701         | 7         | 88,102,149         | C/T           | 0.35            | +      | 0.05           | 9.3E-05           | <i>MGC26647/ ZNF804B</i> |
| rs3807971         | 7         | 115,655,129        | C/T           | 0.15            | -      | 0.11           | 8.4E-05           | <i>TES</i>               |
| rs1035205         | 7         | 117,332,711        | C/T           | 0.62            | -      | 0.34           | 8.5E-05           | <i>CTTNBP2/ LSM8</i>     |
| rs1548459         | 7         | 117,354,473        | A/C           | 0.62            | +      | 0.35           | 6.5E-05           | <i>CTTNBP2/ LSM8</i>     |
| rs2949761         | 7         | 142,922,064        | A/G           | 0.04            | +      | 3.8E-05        | 0.04              |                          |
| rs2384844         | 8         | 123,875,421        | C/T           | 0.22            | -      | 6.5E-06        | 0.03              | <i>ZHX2</i>              |
| rs10758849        | 9         | 7,258,068          | A/G           | 0.41            | -      | 2.8E-05        | 0.04              | <i>JMJD2C</i>            |
| rs2148189         | 10        | 4,018,083          | C/T           | 0.49            | -      | 7.4E-05        | 0.40              | <i>KLF6</i>              |
| rs7917417         | 10        | 26,234,425         | A/G           | 0.85            | +      | 0.002          | 3.7E-05           |                          |
| rs12259899        | 10        | 26,274,617         | A/G           | 0.86            | -      | 0.002          | 3.6E-05           | <i>MYO3A</i>             |
| rs7910887         | 10        | 33,730,587         | C/T           | 0.42            | +      | 6.8E-05        | 0.001             | <i>NRP1/ PARD3</i>       |
| rs1334469         | 10        | 116,101,018        | A/G           | 0.52            | +      | 0.006          | 1.8E-05           | <i>AFAPIL2</i>           |
| rs12287008        | 11        | 114,166,676        | C/T           | 0.88            | -      | 1.9E-05        | 0.002             | <i>FAM55B</i>            |
| rs7122693         | 11        | 114,809,573        | A/G           | 0.36            | +      | 6.1E-05        | 0.01              | <i>CADM1</i>             |
| rs681524*         | 11        | 116,253,524        | A/G           | 0.06            | -      | 1.1E-05        | 0.003             | <i>KIAA0999</i>          |
| rs7949670         | 11        | 117,036,145        | A/C           | 0.87            | +      | 4.6E-06        | 0.006             | <i>DSCAML1</i>           |
| <b>rs10892151</b> | <b>11</b> | <b>117,036,941</b> | <b>A/G</b>    | <b>0.97</b>     | -      | <b>3.8E-14</b> | <b>2.8E-10</b>    | <b><i>DSCAML1</i></b>    |
| rs11607985        | 11        | 117,535,008        | C/G           | 0.12            | +      | 8.9E-07        | 8.4E-04           | <i>SCN4B</i>             |
| <b>rs11608072</b> | <b>11</b> | <b>117,535,296</b> | <b>C/G</b>    | <b>0.86</b>     | +      | <b>8.4E-08</b> | <b>6.9E-05</b>    | <b><i>SCN4B</i></b>      |
| rs11600901        | 11        | 117,537,196        | C/T           | 0.10            | -      | 2.7E-05        | 9.6E-04           | <i>SCN4B</i>             |
| rs10892287        | 11        | 118,148,209        | C/T           | 0.76            | +      | 4.6E-05        | 0.004             | <i>DDX6</i>              |
| rs10892306        | 11        | 118,256,536        | A/T           | 0.08            | -      | 6.6E-05        | 3.4E-04           | <i>BLR1</i>              |
| rs11217695        | 11        | 119,482,835        | A/G           | 0.93            | -      | 8.5E-06        | 2.4E-05           | <i>PVRL1/ TRIM29</i>     |
| rs6589804         | 11        | 119,666,851        | A/G           | 0.90            | +      | 3.6E-05        | 7.2E-04           | <i>POU2F3</i>            |
| rs12278532        | 11        | 119,986,983        | A/G           | 0.37            | -      | 5.5E-05        | 0.02              | <i>GRIK4</i>             |
| rs7925270         | 11        | 120,068,508        | A/G           | 0.49            | -      | 2.0E-05        | 0.001             | <i>GRIK4</i>             |
| rs11217989        | 11        | 120,089,193        | A/G           | 0.18            | -      | 1.3E-05        | 0.009             | <i>GRIK4</i>             |
| rs11218513        | 11        | 121,436,070        | A/G           | 0.93            | +      | 2.4E-06        | 8.5E-04           |                          |
| rs492085          | 11        | 121,499,910        | A/C           | 0.07            | -      | 4.4E-05        | 0.005             | <i>BLID</i>              |

← APOA5/A4/C3/A1 Cluster Location:  
116,165,296 - 116,213,548 bp

| SNP              | Chr       | Position           | Alleles (A/B) | Allele Freq (B) | Strand   | ln-FTG p-value | ln-iAUCTG p-value | Nearby Gene(s)                |
|------------------|-----------|--------------------|---------------|-----------------|----------|----------------|-------------------|-------------------------------|
| rs687928         | 11        | 121,501,471        | C/T           | 0.50            | +        | 3.5E-05        | 0.002             | <i>BLID</i>                   |
| rs678586         | 11        | 121,507,814        | A/G           | 0.50            | -        | 3.2E-05        | 0.002             | <i>BLID</i>                   |
| rs594358         | 11        | 121,510,335        | A/T           | 0.50            | +        | 4.2E-05        | 0.003             | <i>BLID</i>                   |
| rs6589937        | 11        | 122,006,372        | G/T           | 0.96            | +        | 2.5E-06        | 1.7E-04           | <i>UBASH3B</i>                |
| <b>rs7951825</b> | <b>11</b> | <b>123,239,793</b> | <b>A/G</b>    | <b>0.04</b>     | <b>-</b> | <b>2.1E-09</b> | <b>4.3E-06</b>    | <b><i>OR6M1/ PMP22CD</i></b>  |
| rs4575285        | 11        | 124,327,379        | C/G           | 0.35            | +        | 4.9E-06        | 2.9E-04           | <i>CCDC15/ HEPACAM/ HEPN1</i> |
| rs1002777        | 11        | 124,949,814        | C/T           | 0.46            | +        | 6.5E-05        | 4.2E-04           | <i>EI24</i>                   |
| rs519297         | 11        | 125,140,621        | C/G           | 0.99            | -        | 9.7E-05        | 0.002             | <i>C11orf38/ PATE</i>         |
| rs10893450       | 11        | 125,323,964        | C/G           | 0.77            | -        | 9.9E-06        | 7.2E-05           | <i>CDON/ DDX25</i>            |
| rs11220301       | 11        | 125,357,483        | C/T           | 0.16            | +        | 4.9E-05        | 0.003             | <i>CDON</i>                   |
| rs17136789       | 11        | 126,996,515        | A/T           | 0.01            | +        | 5.7E-05        | 0.003             | <i>ETS1</i>                   |
| rs10894845       | 11        | 133,953,680        | C/T           | 0.02            | +        | 1.0E-05        | 0.005             | <i>B3GAT1</i>                 |
| rs11043458       | 12        | 17,479,817         | A/C           | 0.90            | -        | 0.03           | 6.0E-05           |                               |
| rs11044361       | 12        | 18,977,067         | A/T           | 0.56            | -        | 0.01           | 1.8E-05           | <i>CAPZA3</i>                 |
| rs7311139        | 12        | 30,204,772         | A/C           | 0.60            | -        | 6.5E-05        | 7.4E-04           | <i>TMTC1</i>                  |
| rs1948032        | 12        | 30,220,301         | C/T           | 0.38            | +        | 3.6E-05        | 0.004             | <i>TMTC1</i>                  |
| rs1879423        | 12        | 30,226,589         | A/G           | 0.39            | +        | 9.0E-05        | 0.006             | <i>TMTC1</i>                  |
| rs7955747        | 12        | 120,409,487        | C/T           | 0.24            | +        | 0.006          | 9.5E-05           | <i>FBXL10</i>                 |
| rs7491873        | 13        | 36,849,949         | A/G           | 0.64            | +        | 9.6E-05        | 2.4E-04           | <i>POSTN</i>                  |
| rs7981543        | 13        | 53,211,477         | A/G           | 0.91            | +        | 9.3E-05        | 7.7E-05           |                               |
| rs2182665        | 13        | 73,360,923         | G/T           | 0.15            | +        | 9.9E-05        | 0.01              | <i>KLF12</i>                  |
| rs9602209        | 13        | 82,998,931         | A/G           | 0.37            | +        | 6.7E-05        | 0.03              | <i>SLITRK1</i>                |
| rs1046146        | 15        | 72,493,996         | A/G           | 0.94            | +        | 4.4E-05        | 0.005             | <i>SEMA7A</i>                 |
| rs11073029       | 15        | 80,132,145         | C/G           | 0.67            | +        | 0.05           | 4.3E-05           | <i>EFTUD1/ MEX3B</i>          |
| rs17670098       | 16        | 7,149,248          | A/C           | 0.93            | +        | 0.004          | 5.6E-05           | <i>A2BP1</i>                  |
| rs16962399       | 16        | 55,404,305         | A/G           | 0.88            | -        | 5.1E-05        | 5.4E-04           | <i>NUP93</i>                  |
| rs16962767       | 16        | 55,431,290         | A/G           | 0.11            | -        | 7.5E-05        | 2.7E-04           | <i>NUP93</i>                  |
| rs11861237       | 16        | 63,697,996         | C/T           | 0.20            | +        | 9.4E-05        | 0.002             | <i>CDH11</i>                  |
| rs1471379        | 16        | 80,068,200         | C/T           | 0.40            | +        | 0.89           | 6.5E-05           | <i>CMIP</i>                   |
| rs1471152        | 16        | 80,070,137         | G/T           | 0.40            | +        | 0.96           | 8.7E-05           | <i>CMIP</i>                   |
| rs2125202        | 16        | 80,078,795         | C/G           | 0.49            | -        | 0.40           | 6.4E-05           | <i>CMIP</i>                   |
| rs17808998       | 17        | 8,919,071          | A/G           | 0.75            | -        | 0.44           | 1.8E-05           | <i>NTN1</i>                   |
| rs9303273        | 17        | 11,094,564         | A/G           | 0.89            | +        | 0.06           | 3.9E-05           |                               |



| SNP        | Chr | Position   | Alleles (A/B) | Allele Freq (B) | Strand | ln-FTG p-value | ln-iAUCTG p-value | Nearby Gene(s)      |
|------------|-----|------------|---------------|-----------------|--------|----------------|-------------------|---------------------|
| rs11078890 | 17  | 11,095,333 | C/T           | 0.11            | -      | 0.10           | 9.0E-05           |                     |
| rs8069247  | 17  | 11,097,192 | C/T           | 0.11            | -      | 0.12           | 6.9E-05           |                     |
| rs8069599  | 17  | 11,097,447 | C/T           | 0.11            | -      | 0.10           | 8.0E-05           |                     |
| rs16947073 | 17  | 59,187,050 | A/G           | 0.96            | +      | 5.4E-05        | 0.21              | <i>CCDC47</i>       |
| rs4798097  | 18  | 3,498,295  | C/T           | 0.56            | +      | 0.005          | 1.5E-05           | <i>DLGAP1</i>       |
| rs16966092 | 18  | 18,171,472 | G/T           | 0.15            | -      | 1.2E-04        | 7.6E-05           |                     |
| rs807969   | 19  | 7,744,484  | G/T           | 0.09            | +      | 1.1E-05        | 0.02              | <i>CLEC4M</i>       |
| rs4808199  | 19  | 19,406,099 | C/T           | 0.20            | -      | 3.2E-05        | 0.002             | <i>GATAD2A</i>      |
| rs1621688  | 19  | 20,079,226 | C/T           | 0.40            | -      | 0.001          | 9.2E-05           | <i>ZNF253</i>       |
| rs2198895  | 19  | 36,061,034 | A/G           | 0.96            | +      | 4.7E-05        | 0.04              | <i>ZNF536</i>       |
| rs2756260  | 20  | 4,657,986  | A/G           | 0.89            | -      | 0.01           | 4.1E-05           | <i>PRND/ PRNT</i>   |
| rs2422958  | 20  | 4,697,289  | G/T           | 0.26            | -      | 7.3E-05        | 0.13              | <i>PRNT/ RASSF2</i> |
| rs35574319 | 22  | 33,181,133 | A/G           | 0.35            | -      | 9.4E-05        | 0.009             |                     |
| rs5995078  | 22  | 33,928,379 | A/T           | 0.83            | +      | 3.9E-05        | 0.02              | <i>ISX</i>          |
| rs932290   | 22  | 34,002,183 | A/G           | 0.30            | +      | 5.4E-05        | 0.03              | <i>HMG2L1</i>       |
| rs5755683  | 22  | 34,005,537 | A/G           | 0.30            | +      | 1.0E-04        | 0.03              | <i>HMG2L1</i>       |

Table S3: Triglyceride levels in mg/dl (or mg/dl x 6 hours for tAUCTG and iAUCTG) during the high fat challenge by rs10892151 genotype and p-values for analyses adjusted for sex and sex-specific age and age<sup>2</sup> and BMI.

| Trait      | GG<br>Median (IQR) | AG<br>Median (IQR) | p-value                 |
|------------|--------------------|--------------------|-------------------------|
| N          | 763                | 46                 | --                      |
| Fasting TG | 57 (42 – 81)       | 32 (25 – 46)       | 3.8 x 10 <sup>-14</sup> |
| Hour 1 TG  | 76 (57 – 108)      | 48 (33 – 67)       | 8.1 x 10 <sup>-12</sup> |
| Hour 2 TG  | 122 (89 – 170)     | 73 (49 – 93)       | 3.1 x 10 <sup>-13</sup> |
| Hour 3 TG  | 155 (109 – 220)    | 86 (65 – 121)      | 8.8 x 10 <sup>-14</sup> |
| Hour 4 TG  | 159 (111 – 238)    | 88 (66 – 109)      | 1.3 x 10 <sup>-13</sup> |
| Hour 6 TG  | 137 (92 – 220)     | 77 (52 – 108)      | 1.1 x 10 <sup>-9</sup>  |
| MAXTG      | 184 (130 – 265)    | 105 (78 – 140)     | 5.8 x 10 <sup>-13</sup> |
| iMAXTG     | 122 (83 – 184)     | 66 (52 – 99)       | 8.3 x 10 <sup>-10</sup> |
| tAUCTG     | 770 (560 – 1102)   | 425 (327 – 581)    | 1.6 x 10 <sup>-14</sup> |
| iAUCTG     | 413 (276 – 610)    | 216 (163 – 337)    | 2.8 x 10 <sup>-10</sup> |

Table S4: Triglyceride levels in mg/dl (or mg/dl x 6 hours for tAUCTG and iAUCTG) during the high fat challenge by *APOC3* R19X genotype. Analyses are of ln-transformed traits adjusted for sex- and sex-specific age and age<sup>2</sup> in addition to the covariates indicated.

| Trait      | RR (CC)<br>Median (IQR) | RX (CT)<br>Median (IQR) | p-value                 | p-value<br>(BMI-<br>adjusted) | p-value<br>(BMI and<br>FTG adjusted) |
|------------|-------------------------|-------------------------|-------------------------|-------------------------------|--------------------------------------|
| N          | 763                     | 39                      | --                      | --                            | --                                   |
| Fasting TG | 57 (42 – 81)            | 31 (25 – 48)            | 4.2 x 10 <sup>-11</sup> | 4.1 x 10 <sup>-13</sup>       | --                                   |
| Hour 1 TG  | 76 (57 – 107)           | 47 (33 – 66)            | 2.9 x 10 <sup>-10</sup> | 5.4 x 10 <sup>-12</sup>       | 0.12                                 |
| Hour 2 TG  | 122 (88 – 170)          | 73 (49 – 93)            | 2.0 x 10 <sup>-11</sup> | 5.8 x 10 <sup>-13</sup>       | 0.008                                |
| Hour 3 TG  | 154 (109 – 217)         | 75 (64 – 119)           | 1.5 x 10 <sup>-12</sup> | 3.5 x 10 <sup>-14</sup>       | 0.002                                |
| Hour 4 TG  | 159 (110 – 237)         | 85 (65 – 112)           | 1.5 x 10 <sup>-10</sup> | 4.1 x 10 <sup>-12</sup>       | 0.03                                 |
| Hour 6 TG  | 136 (92 – 219)          | 76 (52 – 105)           | 1.3 x 10 <sup>-8</sup>  | 2.0 x 10 <sup>-9</sup>        | 0.59                                 |
| MAXTG      | 183 (130 – 265)         | 104 (95 – 115)          | 4.8 x 10 <sup>-11</sup> | 1.5 x 10 <sup>-12</sup>       | 0.02                                 |
| iMAXTG     | 121 (83 – 183)          | 60 (51 – 90)            | 6.5 x 10 <sup>-9</sup>  | 1.0 x 10 <sup>-9</sup>        | 0.03                                 |
| tAUCTG     | 761 (556 – 1098)        | 411 (322 – 581)         | 4.1 x 10 <sup>-12</sup> | 5.0 x 10 <sup>-14</sup>       | 0.006                                |
| iAUCTG     | 410 (276 – 608)         | 214 (154 – 338)         | 2.0 x 10 <sup>-9</sup>  | 2.7 x 10 <sup>-10</sup>       | 0.01                                 |

Table S5: Association of *APOC3* R19X mutation with lipid and calcification levels in the Amish Family Calcification Study. All analyses adjusted for BMI (except ln[CAC+1]), sex and sex-specific age and age<sup>2</sup> as well as residual familial covariance. Shown is mean ± SD for traits analyzed directly and mean (interquartile range) for traits analyzed after natural log transformation.

| Trait                     | AFCS Subset not included in HAPI |                |                               | All AFCS        |                |                               |
|---------------------------|----------------------------------|----------------|-------------------------------|-----------------|----------------|-------------------------------|
|                           | RR<br>(n = 656)                  | RX<br>(n = 42) | p-value                       | RR<br>(n = 974) | RX<br>(n = 59) | p-value                       |
| Age (years)               | 60 ± 13                          | 57 ± 11        | 0.28                          | 57 ± 13         | 55 ± 11        | 0.10                          |
| Total Cholesterol (mg/dl) | 215 ± 44                         | 206 ± 41       | 0.51                          | 215 ± 42        | 204 ± 39       | 0.12                          |
| TG (mg/dl)                | 83 (60 – 120)                    | 44 (36 – 57)   | <b>1.9 x 10<sup>-22</sup></b> | 78 (56 – 112)   | 43 (34 – 53)   | <b>2.9 x 10<sup>-29</sup></b> |
| HDL-C (mg/dl)             | 54.9 ± 15.0                      | 69.2 ± 14.9    | <b>1.3 x 10<sup>-14</sup></b> | 56.0 ± 15.0     | 69.3 ± 14.4    | <b>1.3 x 10<sup>-17</sup></b> |
| non-HDL-C (mg/dl)         | 160 ± 44                         | 136 ± 37       | <b>0.001</b>                  | 159 ± 42        | 135 ± 34       | <b>7.7 x 10<sup>-6</sup></b>  |
| LDL-C (mg/dl)             | 140 ± 40                         | 127 ± 36       | 0.15                          | 140 ± 39        | 126 ± 33       | <b>0.01</b>                   |
| ln(CAC score +1)          | 2.9 ± 2.8                        | 1.9 ± 2.7      | <b>0.03</b>                   | 2.5 ± 2.7       | 1.6 ± 2.5      | <b>0.005</b>                  |

Figure S1

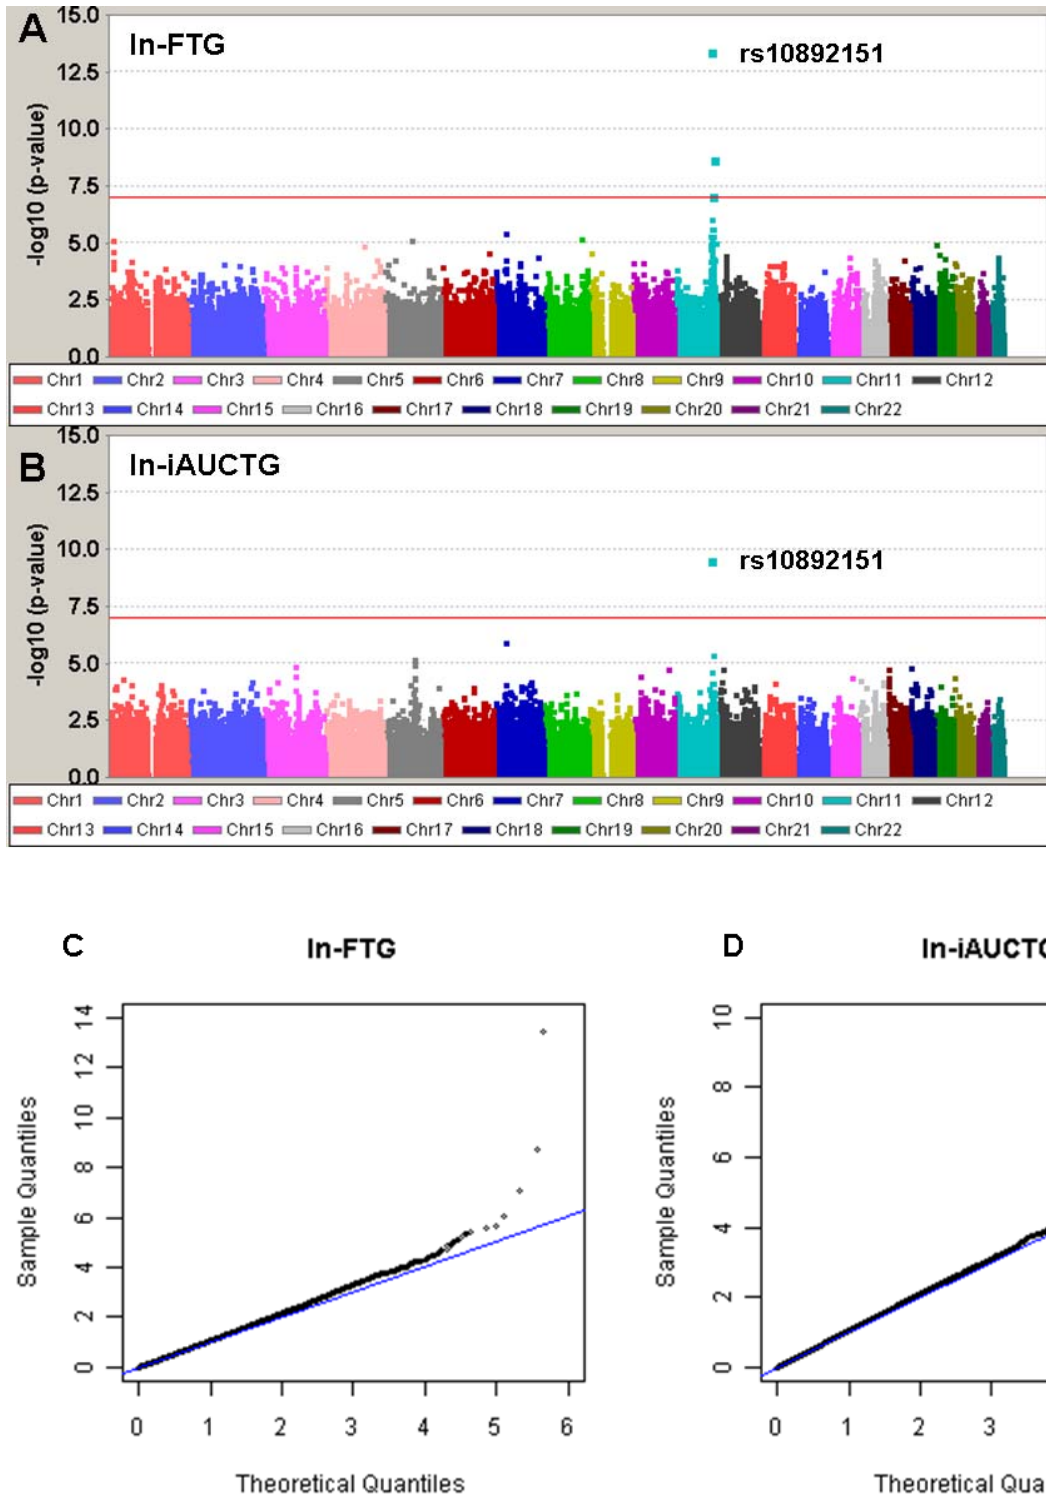

Figure S1: GWAS results for ln-FTG (A) and ln-iAUCTG (B) plotted using Haploview Version 4.1 (S14) and associated quantile-quantile plots (C and D).

Figure S2

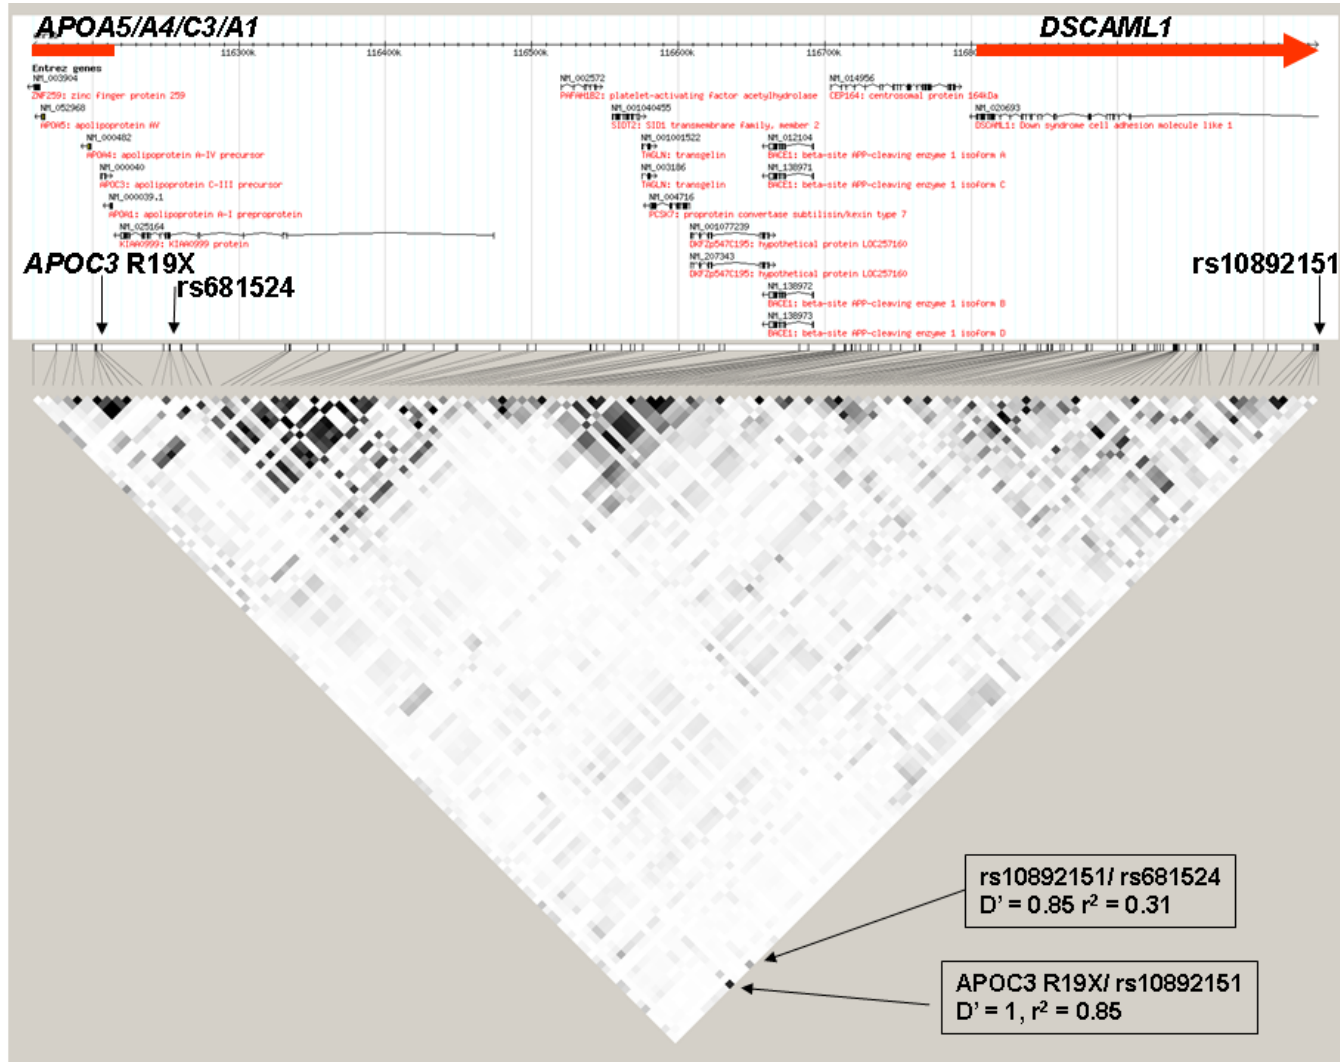

Figure S2: Linkage disequilibrium structure in the Amish of the 872 kb region from the *APOA5/A4/C3/A1* cluster to the GWAS SNP most highly associated with ln-FTG and ln-IAUCTG, located in the *DSCAML1* gene.

Figure S3

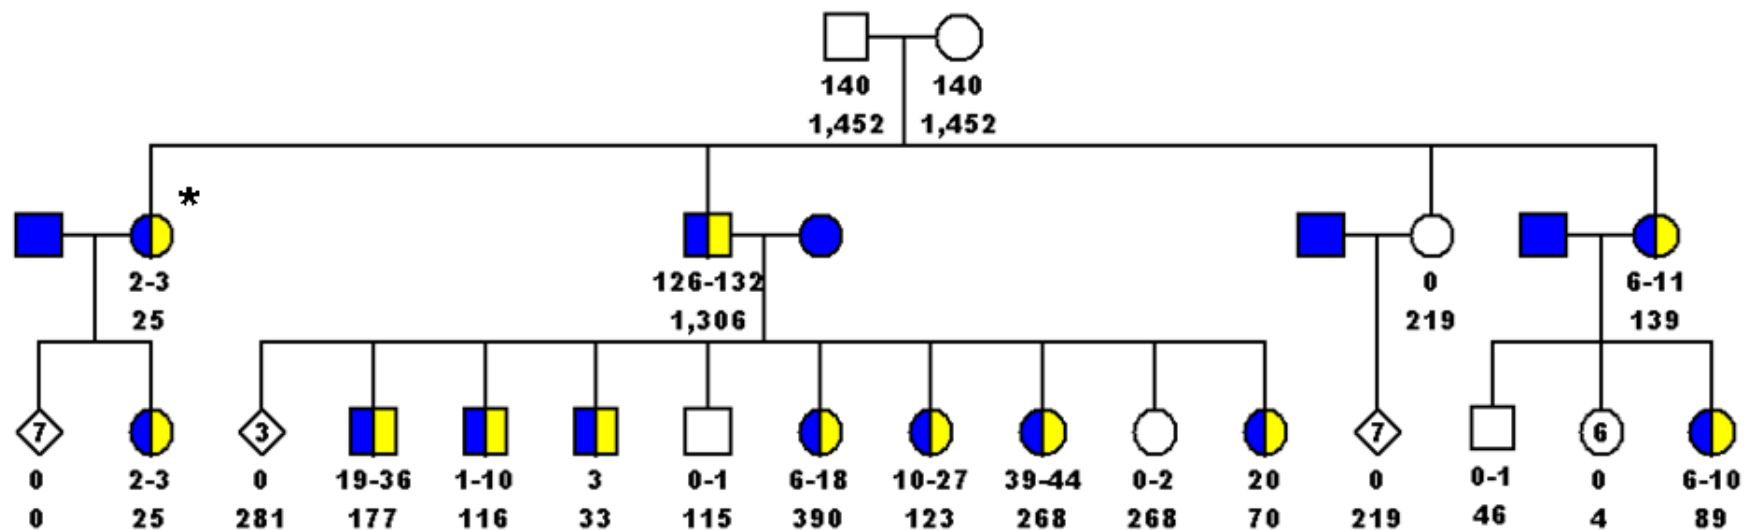

Figure S3: Pedigree showing the first two generations of transmission of the *APOC3* R19X mutation from the most recent common ancestor couple, born in the early 19<sup>th</sup> century. Solid blue symbols indicate non-descendants inferred to have the RR genotype. Blue/yellow symbols indicate obligate R19X carriers. Open symbols have unknown genotypes. Numbers within symbols indicate the number of individuals. The first line of text below each symbol indicates the number of genotyped descendants receiving the 19X allele from that individual and the second line indicates the number of descendants genotyped. A range given for the first line indicates that some descendant 19X alleles may have come from a different progenitor. For example, the individual with the asterisk is a direct ancestor of 25 genotyped individuals. Of those 25, two descendants received the 19X allele from her and a third descendant received the allele either from her or her brother.

**Figure S4**

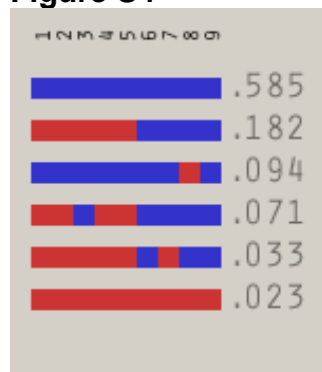

| SNP      | Name        | Position (bp)      | MAF         | Genes                        | Relative Location                    | ln-FTG p-value                          | Ln-iAUCTG p-value                       |
|----------|-------------|--------------------|-------------|------------------------------|--------------------------------------|-----------------------------------------|-----------------------------------------|
| 1        | rs2727789   | 116,202,097        | 0.32        | <i>APOA4</i><br><i>APOC3</i> | 2.9 kb downstream<br>3.7 kb upstream | 0.03                                    | 0.05                                    |
| 2        | rs2849176   | 116,202,131        | 0.32        | <i>APOA4</i><br><i>APOC3</i> | 2.9 kb downstream<br>3.7 kb upstream | 0.04                                    | 0.05                                    |
| 3        | rs2849174   | 116,202,276        | 0.24        | <i>APOA4</i><br><i>APOC3</i> | 3.1 kb downstream<br>3.6 kb upstream | 0.007                                   | 0.03                                    |
| 4        | rs2071523   | 116,202,554        | 0.32        | <i>APOA4</i><br><i>APOC3</i> | 3.3 kb downstream<br>3.3 kb upstream | 0.04                                    | 0.05                                    |
| 5        | rs2071521   | 116,203,058        | 0.32        | <i>APOA4</i><br><i>APOC3</i> | 3.8 kb downstream<br>2.8 kb upstream | 0.04                                    | 0.06                                    |
| <b>6</b> | <b>R19X</b> | <b>116,206,563</b> | <b>0.02</b> | <b><i>APOC3</i></b>          | <b>Exon 2</b>                        | <b><math>4.1 \times 10^{-13}</math></b> | <b><math>2.0 \times 10^{-10}</math></b> |
| 7        | rs681524    | 116,253,524        | 0.06        | <i>KIAA0999</i>              | Intron 6                             | $1.1 \times 10^{-5}$                    | 0.003                                   |
| 8        | rs7949670   | 117,036,145        | 0.12        | <i>DSCAML1</i>               | Intron 3                             | $4.6 \times 10^{-6}$                    | 0.006                                   |
| 9        | rs10892151  | 117,036,941        | 0.03        | <i>DSCAML1</i>               | Intron 3                             | $3.8 \times 10^{-14}$                   | $2.8 \times 10^{-10}$                   |

Figure S4: Haplotype structure in the Amish of the *APOA5/C3/A4/A1* cluster and selected additional SNPs in the 835 kb region containing both *APOC3* and rs10892151, the SNP in *DSCAML1* originally identifying the association. SNPs 1 – 5 comprise all SNPs in the *APOA5/C3/A4/A1* cluster contained on the Affymetrix 500K gene chip, and SNPs 7 – 9 are additional SNPs on the chip. SNP 6 is the *APOC3* R19X mutation identified by sequencing and is found on a single extended haplotype (solid red bar).

Figure S5

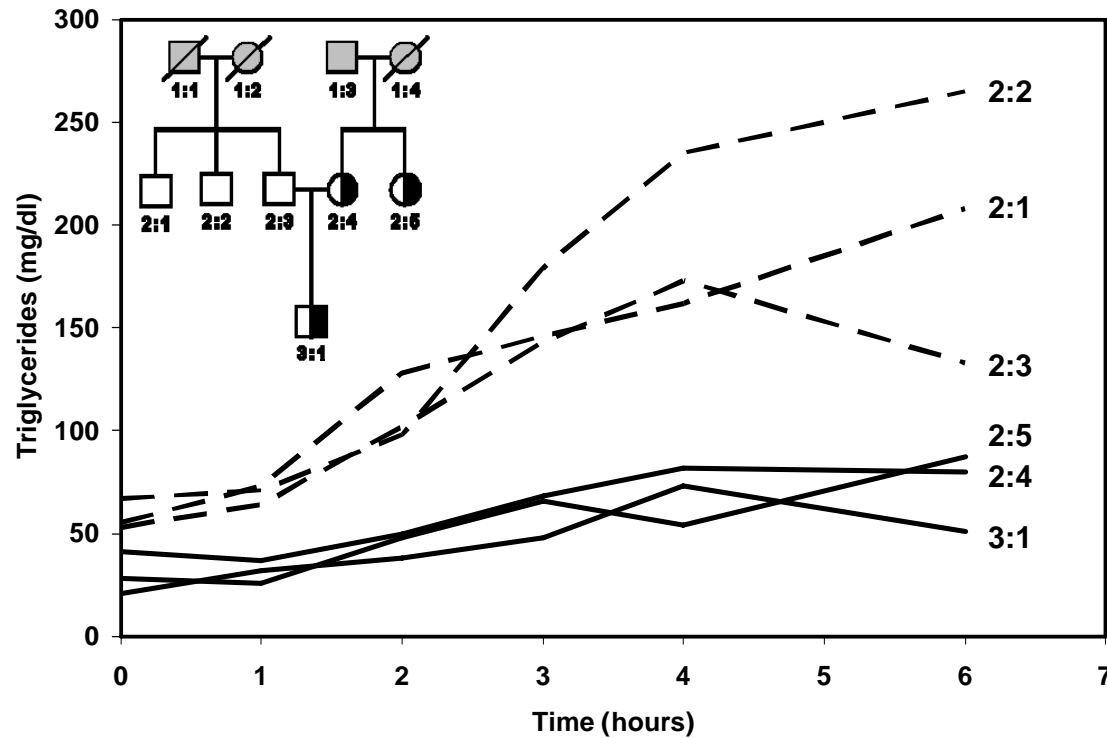

Figure S5: Segregation of the *APOC3* R19X mutation with hypotriglyceridemia and blunted postprandial triglyceride response in a representative family. Square symbols represent males and circles represent females. Individuals carrying the 19X allele are indicated by half-filled pedigree symbols and solid lines; their non-carrier relatives are indicated by open pedigree symbols and broken lines. Grayed individuals were not studied.



Figure S6

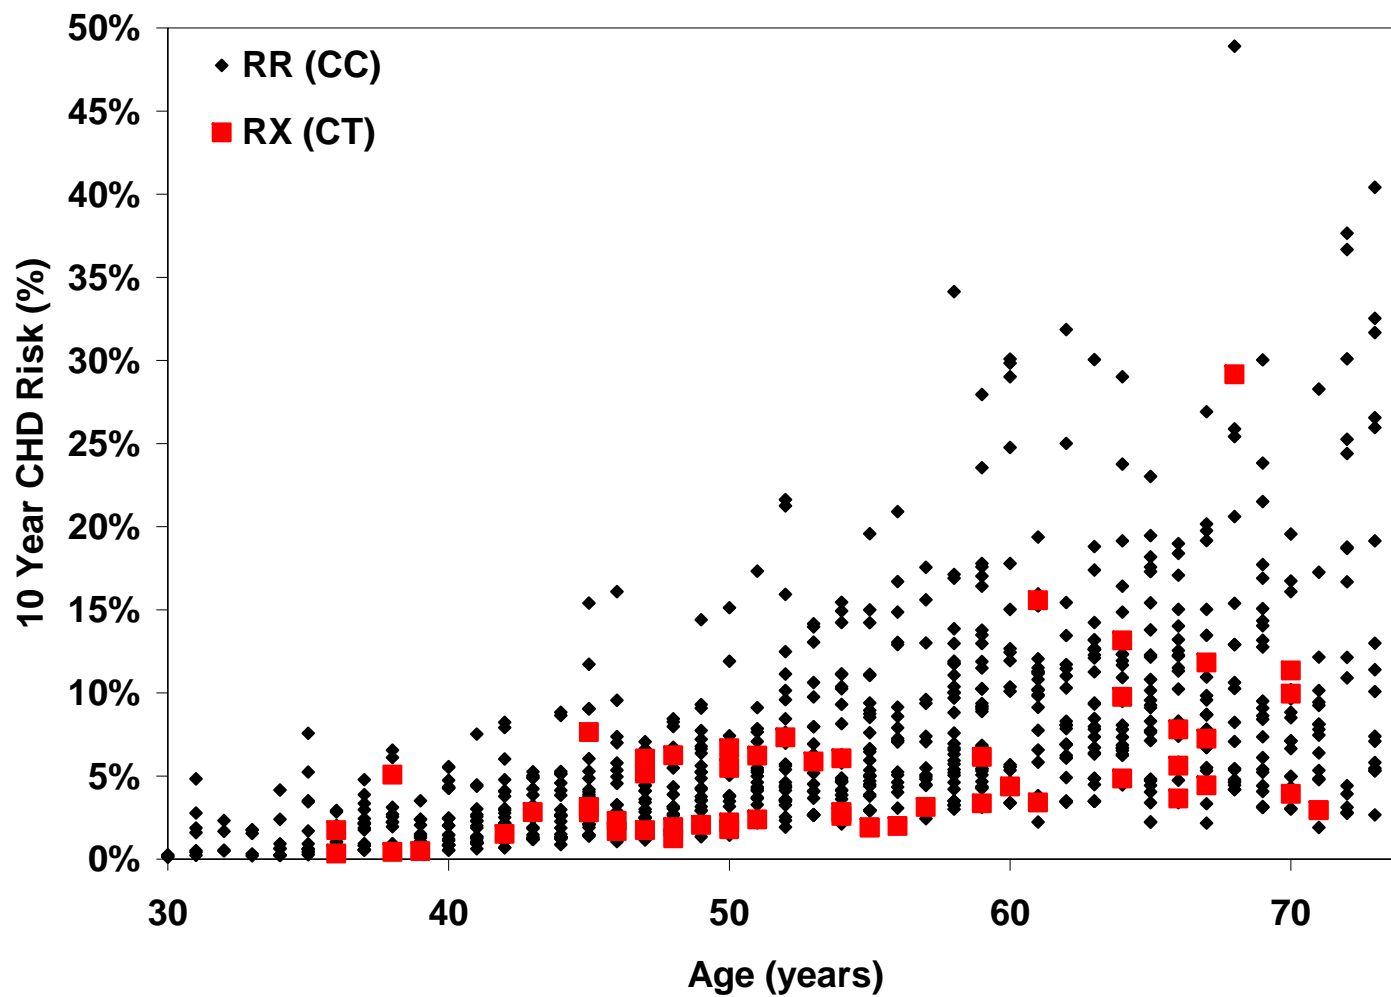

Figure S6: Scatter plot of Framingham 10 year risk of coronary heart disease (*S8*) by age and *APOC3* R19X genotype. Individuals heterozygous for the 19X allele are shown by red squares; those homozygous for the normal *APOC3* allele shown with black diamonds.

Figure S7

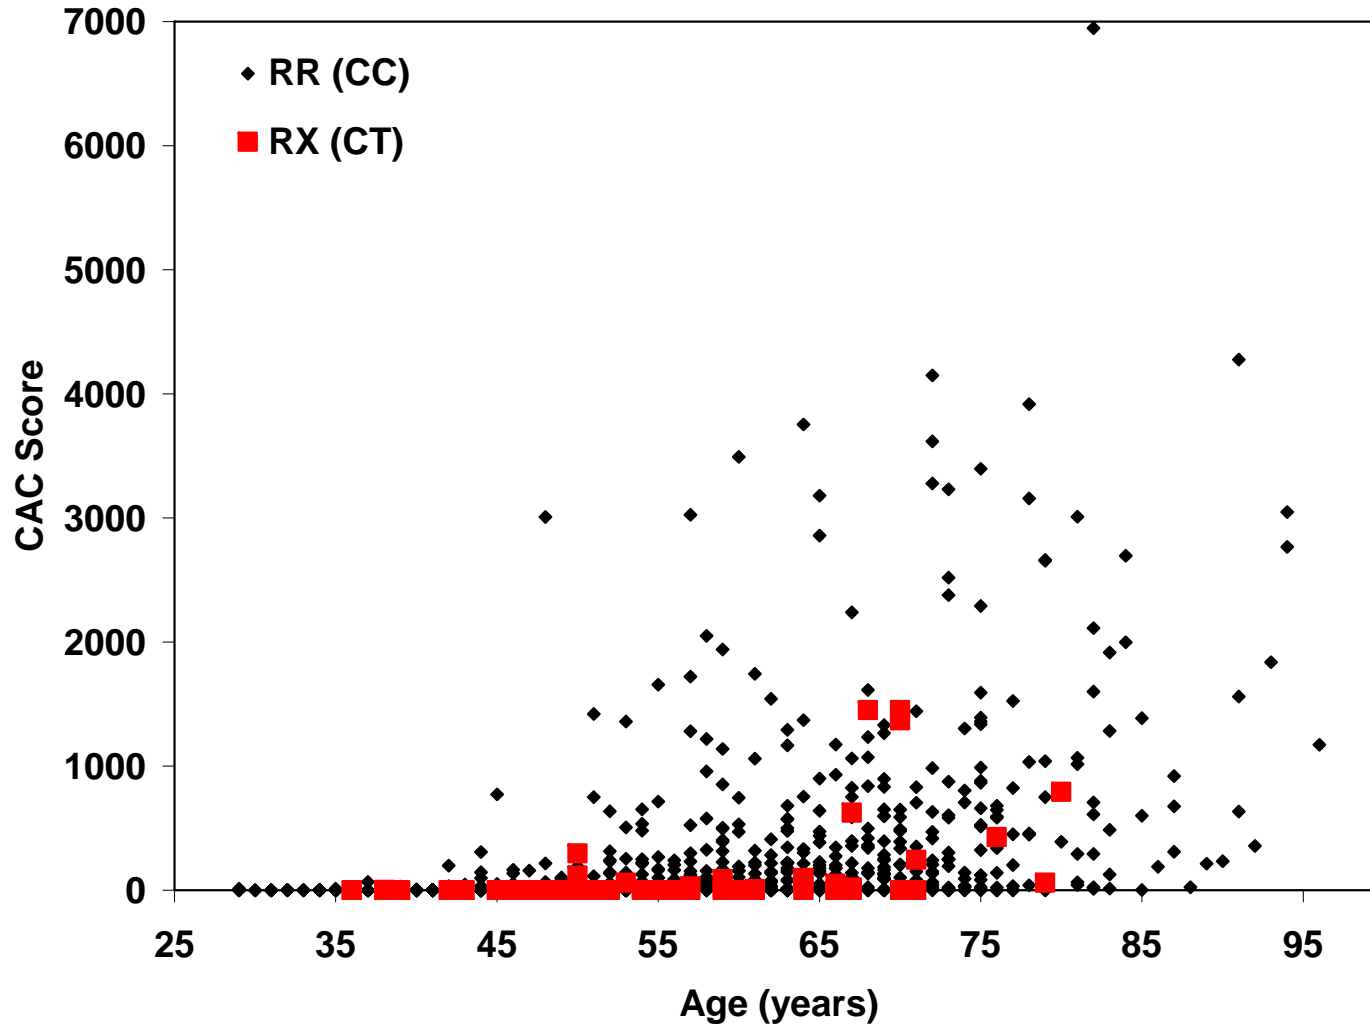

Figure S7: Scatter plot of coronary artery calcification score (CAC) in Agatston units by age and *APOC3* R19X genotype. Individuals heterozygous for the 19X allele are shown by red squares; those homozygous for the normal *APOC3* allele shown with black diamonds.

**Figure S8**

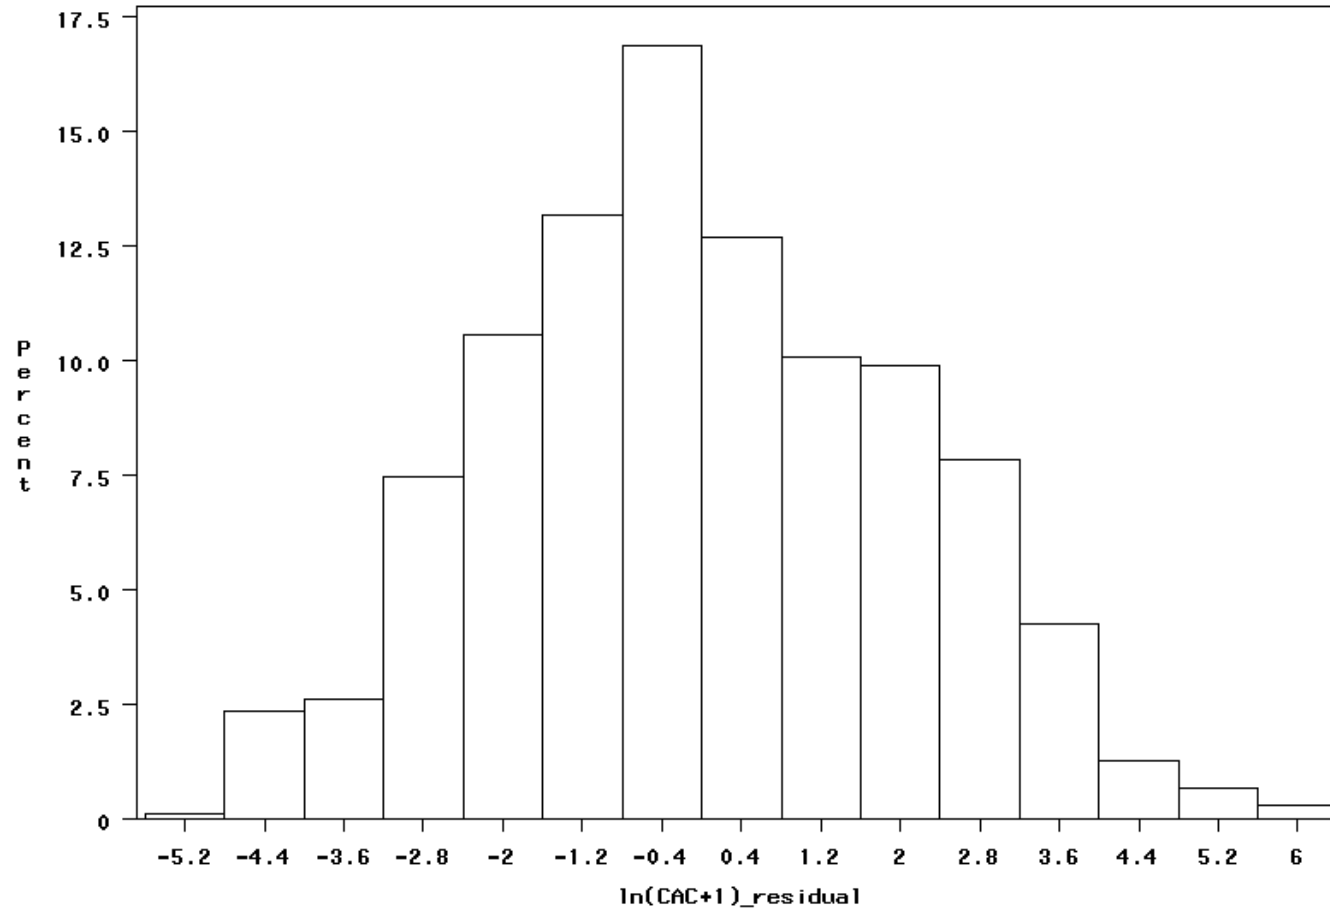

Figure S8: Distribution of residuals of the trait  $\ln(\text{CAC score} + 1)$  adjusted for age and sex in 1,033 participants of the Amish Family Calcification Study.

## References

- S1. B. D. Mitchell *et al.*, *Am. Heart J.* **155**, 823 (2008).
- S2. K. Beiler, *Fisher Family History: Descendants and History of Christian Fisher (1757-1838)* (Eby's Quality Printing, Ronk's, PA, 1988).
- S3. K. Beiler, *Church Directory of the Lancaster County Amish* (Pequea Publishers, Gordonville, PA, 2002).
- S4. R. Agarwala, A. A. Schäffer, J. F. Tomlin, *Hum. Biol.* **73**, 533 (2001).
- S5. R. Agarwala, L. G. Biesecker, K. A. Hopkins, C. A. Francomano, A. A. Schäffer, *Genome Res.* **8**, 211 (1998).
- S6. W. Post *et al.*, *Circulation* **115**, 717 (2007).
- S7. W. T. Friedewald, R. I. Levy, D. S. Fredrickson, *Clin. Chem.* **18**, 499 (1972).
- S8. P. W. Wilson *et al.*, *Circulation* **97**, 1837 (1998).
- S9. H. Shen *et al.*, *Calcif. Tissue Int.* **80**, 244 (2007).
- S10. A. S. Agatston *et al.*, *J. Am. Coll. Cardiol.* **15**, 827 (1990).
- S11. H. Yamamoto *et al.*, *Int. J. Cardiovasc. Imaging* **18**, 391 (2002).
- S12. M. Adamzik *et al.*, *Invest. Radiol.* **34**, 767 (1999).
- S13. J. R. O'Connell, "Optimizing genome-wide measured genotype association analysis in family data (in preparation)," (2008).
- S14. J. C. Barrett, B. Fry, J. Maller, M. J. Daly, *Bioinformatics* **21**, 263 (2005).
- S15. R. L. McClelland, H. Chung, R. Detrano, W. Post, R. A. Kronmal, *Circulation* **113**, 30 (2006).
- S16. R. Agarwala, L. G. Biesecker, J. F. Tomlin, A. A. Schäffer, *Am. J. Med. Genet.* **86**, 156 (1999).
- S17. B. Dyke, "PEDSYS: A Pedigree Data Management System," (1994).
